# Supplementary material
Source: publisher site journal article supplement (https://www.degruyterbrill.com/publication/isbn/9783050095295/downloadAsset/9783050095295_Inhaltsverzeichnis.pdf)
Supplement: Supplementary file 1 [file 9783050095295_Inhaltsverzeichnis.pdf]

# INHALT

- 9      **Vorwort**
- 11     **Die Ideologie des Augenblicks**  
Ereignisbilder als Zeugen und Protagonisten der Geschichte  
*Uwe Fleckner*
- 29     **Gestickte Geschichte**  
Der »Teppich von Bayeux« als Visualisierung zeitgenössischer Ereignisse  
*Cornelia Logemann*
- 41     **»Einer für alle ...«**  
Historia, monumentum und allegoria: Der dreifache Ruhm des Guidoriccio  
da Fogliano  
*Ulrich Pfisterer*
- 53     **Aufprall, Schock, Geschichte**  
Paolo Uccellos »Schlacht von San Romano«  
*Hannah Baader*
- 73     **Das Ereignis als politisches Exemplum**  
Über die Bildwürdigkeit der Zeitgeschichte in Jean Fouquets  
»Lit de Justice de Vendôme«  
*Nina Zenker*

- 85     **Ein Wunder geschieht**  
Geschichte und Ideal in Gentile Bellinis »Prozession am Markustag«  
*Rebecca Müller*
- 99     **Ereignis und Vedute**  
Die »Hinrichtung Savonarolas auf der Piazza della Signoria«  
zwischen Stadtansicht und Motivbild  
*Matthias Krüger*
- 113    **Sieg mit den Pinseln**  
Giorgio Vasaris »Schlacht von Lepanto«  
*Iris Wenderholm*
- 127    **Die göttliche Ordnung der Geschichte**  
Massaker und Martyrium im Gemälde »Die Bartholomäusnacht«  
von François Dubois  
*Martin Schieder*
- 141    **Geschichtskonstruktionen im Widerstreit**  
Der Medici- und der Konstantin-Zyklus von Peter Paul Rubens  
*Wolfgang Brassat*
- 159    **Auf der Bühne der Geschichte**  
Die »Übergabe von Breda« des Diego Velázquez  
*Martin Warnke*
- 171    **Der Augenzeuge**  
Gerard Ter Borch und »Der Schwur auf die Ratifikation des Friedens  
von Münster«  
*Karin Gludovatz*
- 185    **Die Personalisierung der Geschichte**  
Charles Le Bruns »Passage du Rhin« in der Spiegelgalerie von Versailles  
zwischen Ereignis und Mythos  
*Hendrik Ziegler*
- 201    **Die handelnde Menge**  
Jacques-Louis Davids »Der Schwur im Ballhaus« als Revolution  
des Historienbildes  
*Wolfgang Kemp*

- 211 **Der Tag danach**  
»Napoleon auf dem Schlachtfeld von Eylau« von Antoine-Jean Gros  
*Gerrit Walczak*
- 221 **Das Pathos der Sinnlosigkeit**  
Moderne Geschichtserfahrung in Francisco Goyas »Erschießung der Aufständischen«  
*Werner Busch*
- 235 **Schiffbruch des Zuschauers**  
Théodore Géricaults »Floß der Medusa« als Dekonstruktion des Historienbildes  
*Gregor Wedekind*
- 253 **Vom Ereignisbild zum Bild-Ereignis**  
»Die Freiheit führt das Volk auf die Barrikaden« von Eugène Delacroix  
*Sabine Slanina*
- 267 **Das unfertige Bild und sein fehlendes Publikum**  
Adolph Menzels »Aufbahrung der Märzgefallenen« als visuelle Verdichtung politischen Wandels  
*Françoise Forster-Hahn*
- 279 **Die Unverfügbarkeit der Geschichte**  
Edouard Manet inszeniert die »Erschießung Kaiser Maximilians von Mexiko«  
*Barbara Wittmann*
- 293 **Aufbruch der Malerei**  
Das Ereignis als synästhetischer Schock in Carlo Carràs »Begräbnis des Anarchisten Galli«  
*Kerstin Thomas*
- 305 **Die ewige Wiederkehr des Gleichen**  
Zur Geschichtsauffassung des Gemäldes »Der Krieg« von Otto Dix  
*Olaf Peters*
- 319 **Die Wahrheit der Malerei**  
Pablo Picassos »Guernica« zwischen Atelier- und Ereignisbild  
*Uwe Fleckner*

|     |                                                                                                                                                       |
|-----|-------------------------------------------------------------------------------------------------------------------------------------------------------|
| 341 | <b>Im Angesicht des Holocaust</b><br>Felix Nussbaums »Triumph des Todes« als Allegorie der Zeitgeschichte<br><i>Maïke Steinkamp</i>                   |
| 357 | <b>Ereignis und Medialität</b><br>Andy Warhols »Jackie (The Week That Was)«<br><i>Michael Lüthy</i>                                                   |
| 371 | <b>Unser Mann auf dem Mond</b><br>Apollo 11 und der Weg vom Ereignisbild zum Geschichtsbild<br><i>Hole Rößler</i>                                     |
| 387 | <b>Abstrakte Geschichte</b><br>K. R. H. Sonderborg malt die »Spur Andreas B.« als gestische Chiffre<br><i>Sven Beckstette</i>                         |
| 399 | <b>Das unauslöschliche Gedächtnis der Bilder</b><br>Gerhard Richters Zyklus »18. Oktober 1977«<br><i>Julia Gelshorn</i>                               |
| 417 | <b>Das informelle Historienbild</b><br>Karl Otto Götz und die gemalte Wiedervereinigung Deutschlands<br><i>Christoph Zuschlag</i>                     |
| 431 | <b>Die Enttäuschung des Krieges</b><br>Historisches Ereignis und ästhetisches Nachleben in Jeff Walls »Dead Troops Talk«<br><i>Ursula Frohne</i>      |
| 447 | <b>Das Ereignis und seine Bilder</b><br>Zur medialen Gegenwart des Terroranschlags auf das World Trade Center<br>in New York<br><i>Dietrich Erben</i> |
| 463 | <b>Anmerkungen</b>                                                                                                                                    |
| 523 | <b>Register</b>                                                                                                                                       |
| 531 | <b>Abbildungsnachweis</b>                                                                                                                             |
